# Supplementary material for: Investigation of biodistribution and tissue penetration of PEGylated gold nanostars and their application for photothermal cancer treatment in tumor-bearing mice
Source: Royal Society of Chemistry journal article supplement (doi:10.1039/c9tb02194a), 2019-11-13
Supplement: c9tb02194a1.pdf [file c9tb02194a1.pdf]

### Supplementary data

#### **Investigation of biodistribution and tissue penetration of PEGylated gold nanostars**

#### **and its application for photothermal cancer treatment in tumor-bearing mice**

Chao-Cheng Chen<sup>a,‡</sup>, Deng-Yuan Chang<sup>a,‡</sup>, Jia-Je Li<sup>a</sup>, Hui-Wen Chan<sup>a</sup>, Jenn-Tzong

Chen<sup>b</sup>, Chih-Hsien Chang<sup>b</sup>, Ren-Shyan Liu<sup>a,c,d,e</sup>, C. Allen Chang<sup>a,f,g</sup>, Chuan-Lin Chen<sup>a,\*</sup>,

and Hsin-Ell Wang<sup>a,\*</sup>

<sup>a</sup> National Yang-Ming University, Department of Biomedical Imaging and Radiological Sciences, Taipei, TW.

<sup>b</sup> Institute of Nuclear Energy Research, Taoyuan County, TW.

<sup>c</sup> National Yang-Ming University, Institute of Clinical Medicine Taipei, TW.

<sup>d</sup> National Comprehensive Mouse Phenotyping and Drug Testing Center, Molecular and Genetic Imaging Core/Taiwan Mouse Clinic, Taipei, TW.

<sup>e</sup> Cheng Hsin General Hospital, Department of Nuclear Medicine, Taipei, TW.

<sup>f</sup> National Yang-Ming University, Department of Biotechnology and Laboratory Science in Medicine, Taipei, TW.

<sup>g</sup> National Yang-Ming University, Molecular Imaging Research Center (MIRC), Taipei, TW

\* Corresponding author, [clchen2@ym.edu.tw](mailto:clchen2@ym.edu.tw) (Chuan-Lin Chen); [hewang@ym.edu.tw](mailto:hewang@ym.edu.tw)

(Hsin-Ell Wang)

‡ These authors contributed equally to this work and should be considered as co-first authors.

## Calculation of photothermal conversion efficiency

Two milliliters of pAuNS solution at a concentration of 20 ppm was irradiated with 793 nm laser for 900 s to reach the maximum steady temperature and then cooled down without laser irradiation. The temperature was recorded by a thermal meter every 10 s during this study. We calculated the photothermal conversion efficiency ( $\eta$ ) by the following equation<sup>1</sup>:

$$\eta = \frac{hs(T_{Max} - T_{surr}) - Q_{Dis}}{I(1 - 10^{-A_{793}})} \quad (1)$$

Where  $h$  is the heat transfer coefficient,  $s$  is the surface area of the container, and the value of  $hs$  is obtained from Eq. 4.  $T_{Max}$  and  $T_{surr}$  represented the maximum steady temperature of the pAuNS solution after 790 nm laser irradiation and the environment temperature, respectively. In this study,  $T_{Max}$  of the pAuNS solution and  $T_{surr}$  were 49.2 and 24.2°C, respectively. Hence, the temperature change ( $T_{Max}-T_{surr}$ ) of the pAuNS solution after laser irradiation was 25°C.  $Q_{Dis}$  is heat dissipation from the absorbed light by cuvette and pure water, and the value of  $Q_{Dis}$  was 51.98 mW. The laser power ( $I$ ) and the absorbance of pAuNS at 793 nm were 1.0 W and 0.92, respectively.

In order to gain the value of  $hs$ , the dimensionless parameter  $\theta$  was firstly calculated by the following equation:

$$\theta = \frac{T - T_{surr}}{T_{Max} - T_{surr}} \quad (2)$$

where  $T$  is the temperature in the cooling period according to Fig. 4B.

According to Fig. 4B, the sample system time constant ( $\tau_s$ ) can be computed as

$$t = -\tau_s \ln(\theta) \quad (3)$$

The value of  $\tau_s$  was 441.92 (s), and it can be used for the following equation for calculating the value of  $hS$ .

$$hS = \frac{\sum_i m_i \times C_{p,i}}{\tau_s} \quad (4)$$

where  $m$  is the mass and  $C$  is the heat capacity of each  $i$  component of the sample cell. In this study, the mass of pAuNS solution and quartz cuvette was 2 and 6.07 g, respectively. The heat capacity of pAuNS solution and quartz cuvette was 4.18 and 0.839 J/g·°C, respectively. Hence, the  $hS$  was calculated to be 0.0304 W/°C.

Substituting each parameter in Eq.1, the photothermal conversion efficiency of pAuNS solution (O.D. = 1.0) at a 793 nm laser irradiation was 80.5%.

### Calculation of heat flux per mass and heat capacity of pAuNSs

The heat flux per mass and heat capacity of pAuNS at a concentration of 20 ppm was performed based on the previous study.<sup>2</sup>

$$D = \frac{hs(T_{Max} - T_{surr}) - Q_{Dis}}{\text{mass of solvent or materials}} \quad (5)$$

Therefore,  $D_{\text{water}}$  and  $D_{\text{pAuNS}}$  were 0.355 and  $1.77 \times 10^4$  W/g.

Assuming no heat loss in this system during this experiment, the temperature increase speed can be calculated by the following equation:

$$\text{Temperature increase speed} = \frac{D}{\text{heat capacity of solvent or materials}} \quad (6)$$

Hence, the temperature increase speed of water and pAuNS were 0.085 and  $1.37 \times 10^5$  °C/s.

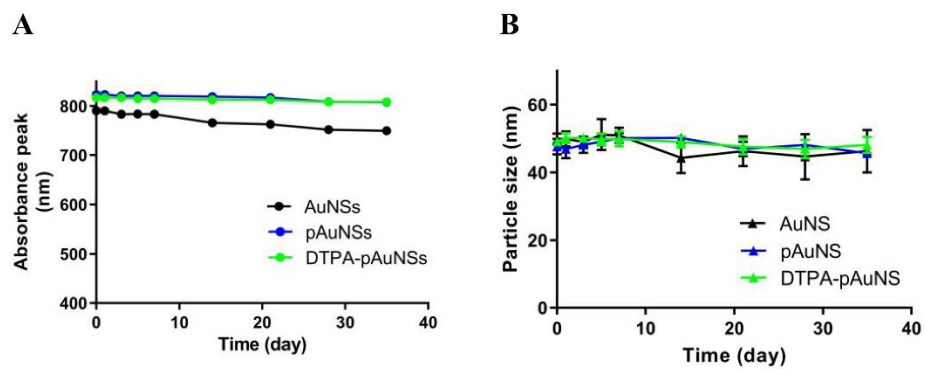

**Fig. S1** Physical stability of AuNSs, pAuNSs and DTPA-pAuNSs incubated in deionized water at 4°C. The change of the absorbance peak (A) and particle size distribution (B) were examined using UV-Visible Spectrophotometer and dynamic light scattering, respectively.

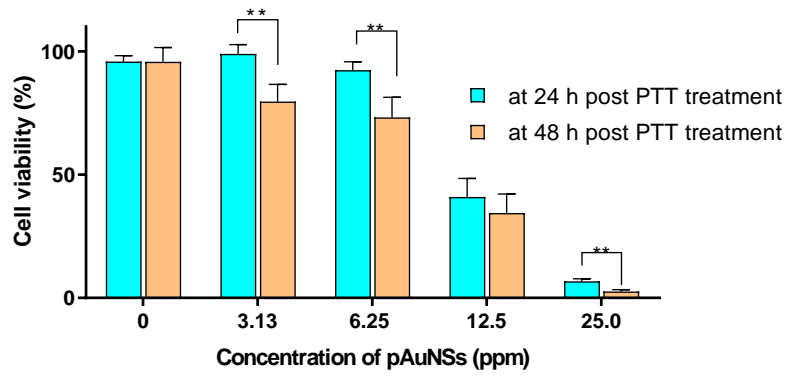

**Fig. S2** Relative cell viability of SKOV-3 cells at 24 h or 48 h post PTT treatment. The cell viability was determined by MTT assay. \*\* indicates  $p < 0.01$ .

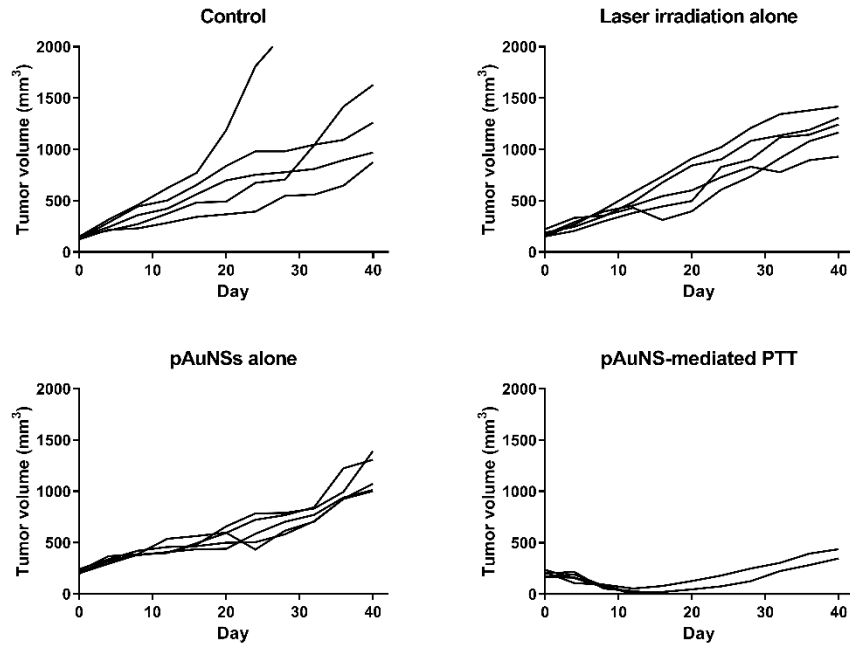

**Fig. S3.** The tumor burden of each SKOV-3 tumor-bearing mouse in the control, laser irradiation alone, pAuNSs alone and pAuNS-mediated PTT groups.



**Table S1.** Summary of UV-Vis peak, hydrodynamic diameter, polydispersity index (PDI) and zeta potential of gold nanostars

| Gold nanoparticles | Absorption peak (nm) | Hydrodynamic diameter (nm) <sup>1</sup> | PDI   | Zeta potential (mV) |
|--------------------|----------------------|-----------------------------------------|-------|---------------------|
| AuNSs              | 791 ± 2.1            | 46.8 ± 3.6                              | 0.350 | -37.41 ± 0.24       |
| pAuNSs             | 823 ± 3.2            | 50.5 ± 2.1                              | 0.223 | -8.69 ± 2.06        |
| DTPA-pAuNSs        | 817 ± 3.5            | 51.4 ± 2.5                              | 0.202 | -15.76 ± 1.45       |

<sup>1</sup>, determined by dynamic light scattering; AuNSs, gold nanostars; pAuNSs, PEGylated gold nanostars; DTPA-pAuNSs, DTPA-conjugated PEGylated gold nanostars

**Table S2.** Photothermal conversion efficiency ( $\eta$ ) of gold nanoparticles developed in this study and those reported in literatures.

| Photothermal agents                     | Particle size (nm)    | Wavelength of laser (nm) | $\eta$ | Reference  |
|-----------------------------------------|-----------------------|--------------------------|--------|------------|
| <b>Gold nanoshells</b>                  | ~40 <sup>a</sup>      | 815                      | 59 %   | 3          |
|                                         | 60                    | 980                      | 61 %   | 2          |
|                                         | 120 <sup>c</sup>      | 808                      | 41.6 % | 4          |
|                                         | ~180 <sup>b</sup>     | 815                      | 30 %   | 3          |
| <b>Gold nanorods</b>                    | 7/26<br>(wide/length) | 808                      | 50 %   | 5          |
|                                         | 10/38.9               | 815                      | 55 %   | 3          |
|                                         | 13/45                 | 808                      | 23.1 % | 6          |
|                                         | 17/56.1               | 808                      | 22.1 % | 7          |
| <b>Gold nanocages</b>                   | 45                    | 808                      | 63.6 % | 7          |
| <b>Gold nanostars</b>                   | 30                    | 980                      | 94 %   | 2          |
|                                         | 50.5                  | 793                      | 80.5 % | This study |
|                                         | ~60 <sup>d</sup>      | 980                      | 78.8 % | 8          |
|                                         | 60                    | 980                      | 90 %   | 2          |
| <b>Hexapods</b>                         | 25                    | 808                      | 29.6 % | 7          |
| <b>Pathy gold-on carbon nanospheres</b> | 185                   | 808                      | 31.6 % | 6          |

a, Au<sub>2</sub>S/Au nanoshells; b, SiO<sub>2</sub>/Au nanoshells; c, Ag/Au nanoshell; d, spiky Au<sub>6</sub> nanoparticles

## Reference

1. C. Ayala-Orozco, C. Urban, M. W. Knight, A. S. Urban, O. Neumann, S. W. Bishnoi, S. Mukherjee, A. M. Goodman, H. Charron, T. Mitchell, M. Shea, R. Roy, S. Nanda, R. Schiff, N. J. Halas and A. Joshi, *ACS nano*, 2014, **8**, 6372-6381.
2. Y. Liu, J. R. Ashton, E. J. Moding, H. Yuan, J. K. Register, A. M. Fales, J. Choi, M. J. Whitley, X. Zhao, Y. Qi, Y. Ma, G. Vaidyanathan, M. R. Zalutsky, D. G. Kirsch, C. T. Badea and T. Vo-Dinh, *Theranostics*, 2015, **5**, 946-960.
3. J. R. Cole, N. A. Mirin, M. W. Knight, G. P. Goodrich and N. J. Halas, *The Journal of Physical Chemistry C*, 2009, **113**, 12090-12094.
4. R. Zhu, Y. Li, X. Zhang, K. Bian, M. Yang, C. Cong, X. Cheng, S. Zhao, X. Li and D. Gao, *Nanotechnology*, 2019, **30**, 055602.
5. V. P. Pattani and J. W. Tunnell, *Lasers in surgery and medicine*, 2012, **44**, 675-684.
6. X. Wang, D. Cao, X. Tang, J. Yang, D. Jiang, M. Liu, N. He and Z. Wang, *ACS applied materials & interfaces*, 2016, **8**, 19321-19332.
7. J. Zeng, D. Goldfeld and Y. Xia, *Angewandte Chemie*, 2013, **52**, 4169-4173.
8. C. Bi, J. Chen, Y. Chen, Y. Song, A. Li, S. Li, Z. Mao, C. Gao, D. Wang, H. Möhwald and H. Xia, *Chemistry of Materials*, 2018, **30**, 2709-2718.
